# Supplementary material for: Risk factors for mortality in preterm infants with necrotizing enterocolitis: a retrospective multicenter analysis
Source: Springer Nature journal article supplement (doi:10.1007/s00431-021-04266-x), 2021-10-12
Supplement: MOESM1 [file 19751074]

| Variable / Field Name | Field Label<br><i>Field Note</i> | Field Attributes (Field Type, Validation, Choices, Calculations, etc.)                               |                                                                                                                                                                                                                                 |   |             |   |                           |   |                  |    |         |   |   |    |         |
|-----------------------|----------------------------------|------------------------------------------------------------------------------------------------------|---------------------------------------------------------------------------------------------------------------------------------------------------------------------------------------------------------------------------------|---|-------------|---|---------------------------|---|------------------|----|---------|---|---|----|---------|
| 1                     | record_id                        | Record ID                                                                                            | text                                                                                                                                                                                                                            |   |             |   |                           |   |                  |    |         |   |   |    |         |
| 2                     | birth_weight                     | Section Header: <i>Perinatal period</i><br>Birth weight (in g)<br><i>number; in gramm; e.g. 1560</i> | text (number, Min: 450, Max: 9999)                                                                                                                                                                                              |   |             |   |                           |   |                  |    |         |   |   |    |         |
| 3                     | birth_length                     | Birth length (in cm)<br><i>number; in cm, e.g. 40</i>                                                | text (number, Min: 20, Max: 65)                                                                                                                                                                                                 |   |             |   |                           |   |                  |    |         |   |   |    |         |
| 4                     | birth_head                       | Birth head circumference<br><i>integer, in cm, e.g. 35</i>                                           | text (integer, Min: 17, Max: 50)                                                                                                                                                                                                |   |             |   |                           |   |                  |    |         |   |   |    |         |
| 5                     | ga_weeks                         | Gestational age (weeks. days)<br><i>number, 2 digits and 1 decimal, weeks.days, e.g. 26.2</i>        | text (number_1dp, Min: 22, Max: 41)                                                                                                                                                                                             |   |             |   |                           |   |                  |    |         |   |   |    |         |
| 6                     | other_comments_pregn2            | Comments pregnancy<br><i>free text</i>                                                               | notes                                                                                                                                                                                                                           |   |             |   |                           |   |                  |    |         |   |   |    |         |
| 7                     | no_infants                       | Number of infants in this birth                                                                      | dropdown <table border="1"> <tr><td>1</td><td>1</td></tr> <tr><td>2</td><td>2</td></tr> <tr><td>3</td><td>3</td></tr> <tr><td>4</td><td>4</td></tr> <tr><td>5</td><td>5</td></tr> <tr><td>99</td><td>unknown</td></tr> </table> | 1 | 1           | 2 | 2                         | 3 | 3                | 4  | 4       | 5 | 5 | 99 | unknown |
| 1                     | 1                                |                                                                                                      |                                                                                                                                                                                                                                 |   |             |   |                           |   |                  |    |         |   |   |    |         |
| 2                     | 2                                |                                                                                                      |                                                                                                                                                                                                                                 |   |             |   |                           |   |                  |    |         |   |   |    |         |
| 3                     | 3                                |                                                                                                      |                                                                                                                                                                                                                                 |   |             |   |                           |   |                  |    |         |   |   |    |         |
| 4                     | 4                                |                                                                                                      |                                                                                                                                                                                                                                 |   |             |   |                           |   |                  |    |         |   |   |    |         |
| 5                     | 5                                |                                                                                                      |                                                                                                                                                                                                                                 |   |             |   |                           |   |                  |    |         |   |   |    |         |
| 99                    | unknown                          |                                                                                                      |                                                                                                                                                                                                                                 |   |             |   |                           |   |                  |    |         |   |   |    |         |
| 8                     | delivery                         | Delivery mode                                                                                        | dropdown <table border="1"> <tr><td>1</td><td>spontaneous</td></tr> <tr><td>2</td><td>assisted vaginal delivery</td></tr> <tr><td>3</td><td>cesarian section</td></tr> <tr><td>99</td><td>unknown</td></tr> </table>            | 1 | spontaneous | 2 | assisted vaginal delivery | 3 | cesarian section | 99 | unknown |   |   |    |         |
| 1                     | spontaneous                      |                                                                                                      |                                                                                                                                                                                                                                 |   |             |   |                           |   |                  |    |         |   |   |    |         |
| 2                     | assisted vaginal delivery        |                                                                                                      |                                                                                                                                                                                                                                 |   |             |   |                           |   |                  |    |         |   |   |    |         |
| 3                     | cesarian section                 |                                                                                                      |                                                                                                                                                                                                                                 |   |             |   |                           |   |                  |    |         |   |   |    |         |
| 99                    | unknown                          |                                                                                                      |                                                                                                                                                                                                                                 |   |             |   |                           |   |                  |    |         |   |   |    |         |

|    |                                                                    |                                                                                  |                                                                                                                                                                                                                                                                                                                                   |   |                                                   |   |                                         |    |                             |   |                          |
|----|--------------------------------------------------------------------|----------------------------------------------------------------------------------|-----------------------------------------------------------------------------------------------------------------------------------------------------------------------------------------------------------------------------------------------------------------------------------------------------------------------------------|---|---------------------------------------------------|---|-----------------------------------------|----|-----------------------------|---|--------------------------|
| 9  | apgar_1                                                            | Apgar 1 minute<br><i>number, 0-10; e.g. 9</i>                                    | text (integer, Min: 0, Max: 10)                                                                                                                                                                                                                                                                                                   |   |                                                   |   |                                         |    |                             |   |                          |
| 10 | apgar_5                                                            | Apgar 5 minutes<br><i>number, 0-10; e.g. 9</i>                                   | text (integer, Min: 0, Max: 10)                                                                                                                                                                                                                                                                                                   |   |                                                   |   |                                         |    |                             |   |                          |
| 11 | apgar_10                                                           | Apgar 10 minutes<br><i>number, 0-10; e.g. 9</i>                                  | text (integer, Min: 0, Max: 10)                                                                                                                                                                                                                                                                                                   |   |                                                   |   |                                         |    |                             |   |                          |
| 12 | del_temperature                                                    | Temperature at delivery/admission<br><i>in Celcius degrees, for example 37.1</i> | text (number_1dp)                                                                                                                                                                                                                                                                                                                 |   |                                                   |   |                                         |    |                             |   |                          |
| 13 | chd                                                                | Congenital heart disease                                                         | dropdown<br><table border="1"> <tr> <td>0</td> <td>no</td> </tr> <tr> <td>3</td> <td>yes</td> </tr> <tr> <td>99</td> <td>unknown</td> </tr> </table>                                                                                                                                                                              | 0 | no                                                | 3 | yes                                     | 99 | unknown                     |   |                          |
| 0  | no                                                                 |                                                                                  |                                                                                                                                                                                                                                                                                                                                   |   |                                                   |   |                                         |    |                             |   |                          |
| 3  | yes                                                                |                                                                                  |                                                                                                                                                                                                                                                                                                                                   |   |                                                   |   |                                         |    |                             |   |                          |
| 99 | unknown                                                            |                                                                                  |                                                                                                                                                                                                                                                                                                                                   |   |                                                   |   |                                         |    |                             |   |                          |
| 14 | other_chd<br>Show the field ONLY if:<br>[chd] = '3' or [chd] = '2' | Other congenital heart disease: description<br><i>free text</i>                  | notes                                                                                                                                                                                                                                                                                                                             |   |                                                   |   |                                         |    |                             |   |                          |
| 15 | pda_treated                                                        | PDA                                                                              | dropdown<br><table border="1"> <tr> <td>1</td> <td>none</td> </tr> <tr> <td>2</td> <td>treated medically</td> </tr> <tr> <td>3</td> <td>treated surgically</td> </tr> </table>                                                                                                                                                    | 1 | none                                              | 2 | treated medically                       | 3  | treated surgically          |   |                          |
| 1  | none                                                               |                                                                                  |                                                                                                                                                                                                                                                                                                                                   |   |                                                   |   |                                         |    |                             |   |                          |
| 2  | treated medically                                                  |                                                                                  |                                                                                                                                                                                                                                                                                                                                   |   |                                                   |   |                                         |    |                             |   |                          |
| 3  | treated surgically                                                 |                                                                                  |                                                                                                                                                                                                                                                                                                                                   |   |                                                   |   |                                         |    |                             |   |                          |
| 16 | chd_cat                                                            | Congenital heart disease categories (nach Pavlovic)                              | dropdown (autocomplete)<br><table border="1"> <tr> <td>1</td> <td>diseases with relevant reverse abdominal flow (A)</td> </tr> <tr> <td>2</td> <td>diseases with lower systolic output (B)</td> </tr> <tr> <td>3</td> <td>cyanotic heart diseases (C)</td> </tr> <tr> <td>4</td> <td>diseases with shunts (D)</td> </tr> </table> | 1 | diseases with relevant reverse abdominal flow (A) | 2 | diseases with lower systolic output (B) | 3  | cyanotic heart diseases (C) | 4 | diseases with shunts (D) |
| 1  | diseases with relevant reverse abdominal flow (A)                  |                                                                                  |                                                                                                                                                                                                                                                                                                                                   |   |                                                   |   |                                         |    |                             |   |                          |
| 2  | diseases with lower systolic output (B)                            |                                                                                  |                                                                                                                                                                                                                                                                                                                                   |   |                                                   |   |                                         |    |                             |   |                          |
| 3  | cyanotic heart diseases (C)                                        |                                                                                  |                                                                                                                                                                                                                                                                                                                                   |   |                                                   |   |                                         |    |                             |   |                          |
| 4  | diseases with shunts (D)                                           |                                                                                  |                                                                                                                                                                                                                                                                                                                                   |   |                                                   |   |                                         |    |                             |   |                          |

|    |                                                                                                    |                                                                                                                                           |                                                                                                                                                                                                                                                                                                    |   |     |   |                                |    |                                            |   |           |    |         |
|----|----------------------------------------------------------------------------------------------------|-------------------------------------------------------------------------------------------------------------------------------------------|----------------------------------------------------------------------------------------------------------------------------------------------------------------------------------------------------------------------------------------------------------------------------------------------------|---|-----|---|--------------------------------|----|--------------------------------------------|---|-----------|----|---------|
|    |                                                                                                    |                                                                                                                                           | 5   pulmonary hypertension (E)                                                                                                                                                                                                                                                                     |   |     |   |                                |    |                                            |   |           |    |         |
| 17 | malformations                                                                                      | Congenital malformations or syndroms                                                                                                      | dropdown<br><table border="1"> <tr> <td>0</td> <td>no</td> </tr> <tr> <td>1</td> <td>minor (1 major organ affected)</td> </tr> <tr> <td>2</td> <td>major (more than one major organ affected)</td> </tr> <tr> <td>3</td> <td>syndromes</td> </tr> <tr> <td>99</td> <td>unknown</td> </tr> </table> | 0 | no  | 1 | minor (1 major organ affected) | 2  | major (more than one major organ affected) | 3 | syndromes | 99 | unknown |
| 0  | no                                                                                                 |                                                                                                                                           |                                                                                                                                                                                                                                                                                                    |   |     |   |                                |    |                                            |   |           |    |         |
| 1  | minor (1 major organ affected)                                                                     |                                                                                                                                           |                                                                                                                                                                                                                                                                                                    |   |     |   |                                |    |                                            |   |           |    |         |
| 2  | major (more than one major organ affected)                                                         |                                                                                                                                           |                                                                                                                                                                                                                                                                                                    |   |     |   |                                |    |                                            |   |           |    |         |
| 3  | syndromes                                                                                          |                                                                                                                                           |                                                                                                                                                                                                                                                                                                    |   |     |   |                                |    |                                            |   |           |    |         |
| 99 | unknown                                                                                            |                                                                                                                                           |                                                                                                                                                                                                                                                                                                    |   |     |   |                                |    |                                            |   |           |    |         |
| 18 | chromosomal_malformations                                                                          | Chromosomal malformations                                                                                                                 | yesno<br><table border="1"> <tr> <td>1</td> <td>Yes</td> </tr> <tr> <td>0</td> <td>No</td> </tr> </table>                                                                                                                                                                                          | 1 | Yes | 0 | No                             |    |                                            |   |           |    |         |
| 1  | Yes                                                                                                |                                                                                                                                           |                                                                                                                                                                                                                                                                                                    |   |     |   |                                |    |                                            |   |           |    |         |
| 0  | No                                                                                                 |                                                                                                                                           |                                                                                                                                                                                                                                                                                                    |   |     |   |                                |    |                                            |   |           |    |         |
| 19 | malformations_desc<br>Show the field ONLY if:<br>[malformations] = '1'<br>or [malformations] = '2' | Congenital malformations or syndromes: description<br><i>free text</i>                                                                    | notes                                                                                                                                                                                                                                                                                              |   |     |   |                                |    |                                            |   |           |    |         |
| 20 | spont_perforation                                                                                  | Section Header: <i>NEC parameters</i><br>Focal gastrointestinal perforation/spontaneous gastrointestinal perforation (separate from NEC!) | dropdown<br><table border="1"> <tr> <td>0</td> <td>no</td> </tr> <tr> <td>1</td> <td>yes</td> </tr> <tr> <td>99</td> <td>unknown</td> </tr> </table>                                                                                                                                               | 0 | no  | 1 | yes                            | 99 | unknown                                    |   |           |    |         |
| 0  | no                                                                                                 |                                                                                                                                           |                                                                                                                                                                                                                                                                                                    |   |     |   |                                |    |                                            |   |           |    |         |
| 1  | yes                                                                                                |                                                                                                                                           |                                                                                                                                                                                                                                                                                                    |   |     |   |                                |    |                                            |   |           |    |         |
| 99 | unknown                                                                                            |                                                                                                                                           |                                                                                                                                                                                                                                                                                                    |   |     |   |                                |    |                                            |   |           |    |         |
| 21 | init_symptoms_date                                                                                 | Initial symptoms date<br><i>dd.mm.yyyy</i>                                                                                                | text (date_dmy)                                                                                                                                                                                                                                                                                    |   |     |   |                                |    |                                            |   |           |    |         |
| 22 | dx_date                                                                                            | Date at Diagnosis (start non per os including gut priming)                                                                                | text (date_dmy, Min: 1970-01-01, Max: 2050-12-31)                                                                                                                                                                                                                                                  |   |     |   |                                |    |                                            |   |           |    |         |

|    |                                     |                                                                                            |                                                                                                                                                                                                                                                                                                                                                                                        |    |                                     |    |                                     |    |                                     |    |                                   |    |                |    |         |
|----|-------------------------------------|--------------------------------------------------------------------------------------------|----------------------------------------------------------------------------------------------------------------------------------------------------------------------------------------------------------------------------------------------------------------------------------------------------------------------------------------------------------------------------------------|----|-------------------------------------|----|-------------------------------------|----|-------------------------------------|----|-----------------------------------|----|----------------|----|---------|
| 23 | age_at_diagnosis                    | Age at diagnoses (calculated)<br><i>calculated field; no data entry</i>                    | calc<br>Calculation:<br>datediff([patient_dob],[dx_date],"d","dmy")                                                                                                                                                                                                                                                                                                                    |    |                                     |    |                                     |    |                                     |    |                                   |    |                |    |         |
| 24 | bell                                | Bell staging (max documented grade)- always report worst documented grading during disease | dropdown, Required<br><table border="1"> <tr><td>21</td><td>stage 2a</td></tr> <tr><td>22</td><td>stage 2b</td></tr> <tr><td>31</td><td>stage 3a</td></tr> <tr><td>32</td><td>stage 3b</td></tr> <tr><td>88</td><td>not applicable</td></tr> <tr><td>99</td><td>unknown</td></tr> </table>                                                                                             | 21 | stage 2a                            | 22 | stage 2b                            | 31 | stage 3a                            | 32 | stage 3b                          | 88 | not applicable | 99 | unknown |
| 21 | stage 2a                            |                                                                                            |                                                                                                                                                                                                                                                                                                                                                                                        |    |                                     |    |                                     |    |                                     |    |                                   |    |                |    |         |
| 22 | stage 2b                            |                                                                                            |                                                                                                                                                                                                                                                                                                                                                                                        |    |                                     |    |                                     |    |                                     |    |                                   |    |                |    |         |
| 31 | stage 3a                            |                                                                                            |                                                                                                                                                                                                                                                                                                                                                                                        |    |                                     |    |                                     |    |                                     |    |                                   |    |                |    |         |
| 32 | stage 3b                            |                                                                                            |                                                                                                                                                                                                                                                                                                                                                                                        |    |                                     |    |                                     |    |                                     |    |                                   |    |                |    |         |
| 88 | not applicable                      |                                                                                            |                                                                                                                                                                                                                                                                                                                                                                                        |    |                                     |    |                                     |    |                                     |    |                                   |    |                |    |         |
| 99 | unknown                             |                                                                                            |                                                                                                                                                                                                                                                                                                                                                                                        |    |                                     |    |                                     |    |                                     |    |                                   |    |                |    |         |
| 25 | severity                            | Disease severity<br><i>no need to fill in, calculated automatically</i>                    | dropdown<br><table border="1"> <tr><td>1</td><td>stad 1 bell not deceased within 48h</td></tr> <tr><td>2</td><td>stad 2 bell not deceased within 48h</td></tr> <tr><td>3</td><td>stad 3 bell not deceased within 48h</td></tr> <tr><td>4</td><td>deceased during first 48 h of NEC</td></tr> <tr><td>88</td><td>not applicable</td></tr> <tr><td>99</td><td>unknown</td></tr> </table> | 1  | stad 1 bell not deceased within 48h | 2  | stad 2 bell not deceased within 48h | 3  | stad 3 bell not deceased within 48h | 4  | deceased during first 48 h of NEC | 88 | not applicable | 99 | unknown |
| 1  | stad 1 bell not deceased within 48h |                                                                                            |                                                                                                                                                                                                                                                                                                                                                                                        |    |                                     |    |                                     |    |                                     |    |                                   |    |                |    |         |
| 2  | stad 2 bell not deceased within 48h |                                                                                            |                                                                                                                                                                                                                                                                                                                                                                                        |    |                                     |    |                                     |    |                                     |    |                                   |    |                |    |         |
| 3  | stad 3 bell not deceased within 48h |                                                                                            |                                                                                                                                                                                                                                                                                                                                                                                        |    |                                     |    |                                     |    |                                     |    |                                   |    |                |    |         |
| 4  | deceased during first 48 h of NEC   |                                                                                            |                                                                                                                                                                                                                                                                                                                                                                                        |    |                                     |    |                                     |    |                                     |    |                                   |    |                |    |         |
| 88 | not applicable                      |                                                                                            |                                                                                                                                                                                                                                                                                                                                                                                        |    |                                     |    |                                     |    |                                     |    |                                   |    |                |    |         |
| 99 | unknown                             |                                                                                            |                                                                                                                                                                                                                                                                                                                                                                                        |    |                                     |    |                                     |    |                                     |    |                                   |    |                |    |         |
| 26 | conservative_treatment              | Section Header: <i>NEC treatment</i><br>Conservative treatment only                        | dropdown<br><table border="1"> <tr><td>0</td><td>no</td></tr> <tr><td>1</td><td>yes</td></tr> <tr><td>99</td><td>unknown</td></tr> </table>                                                                                                                                                                                                                                            | 0  | no                                  | 1  | yes                                 | 99 | unknown                             |    |                                   |    |                |    |         |
| 0  | no                                  |                                                                                            |                                                                                                                                                                                                                                                                                                                                                                                        |    |                                     |    |                                     |    |                                     |    |                                   |    |                |    |         |
| 1  | yes                                 |                                                                                            |                                                                                                                                                                                                                                                                                                                                                                                        |    |                                     |    |                                     |    |                                     |    |                                   |    |                |    |         |
| 99 | unknown                             |                                                                                            |                                                                                                                                                                                                                                                                                                                                                                                        |    |                                     |    |                                     |    |                                     |    |                                   |    |                |    |         |
| 27 | treat_comment                       | Comments conservative treatment<br><i>free text</i>                                        | notes                                                                                                                                                                                                                                                                                                                                                                                  |    |                                     |    |                                     |    |                                     |    |                                   |    |                |    |         |
| 28 | nec_surgery                         | NEC/FIP surgery                                                                            | dropdown<br><table border="1"> <tr><td>0</td><td>no</td></tr> </table>                                                                                                                                                                                                                                                                                                                 | 0  | no                                  |    |                                     |    |                                     |    |                                   |    |                |    |         |
| 0  | no                                  |                                                                                            |                                                                                                                                                                                                                                                                                                                                                                                        |    |                                     |    |                                     |    |                                     |    |                                   |    |                |    |         |

|    |                                                                                                                                           |                                    |                                                                                                                                                                                                                                                                                                                                                                                                                                                                                      |   |               |    |                                                  |   |                                     |   |                                           |    |                                                     |   |       |    |                |
|----|-------------------------------------------------------------------------------------------------------------------------------------------|------------------------------------|--------------------------------------------------------------------------------------------------------------------------------------------------------------------------------------------------------------------------------------------------------------------------------------------------------------------------------------------------------------------------------------------------------------------------------------------------------------------------------------|---|---------------|----|--------------------------------------------------|---|-------------------------------------|---|-------------------------------------------|----|-----------------------------------------------------|---|-------|----|----------------|
|    |                                                                                                                                           |                                    | <table border="1"> <tr> <td>1</td> <td>yes</td> </tr> <tr> <td>99</td> <td>unknown</td> </tr> </table>                                                                                                                                                                                                                                                                                                                                                                               | 1 | yes           | 99 | unknown                                          |   |                                     |   |                                           |    |                                                     |   |       |    |                |
| 1  | yes                                                                                                                                       |                                    |                                                                                                                                                                                                                                                                                                                                                                                                                                                                                      |   |               |    |                                                  |   |                                     |   |                                           |    |                                                     |   |       |    |                |
| 99 | unknown                                                                                                                                   |                                    |                                                                                                                                                                                                                                                                                                                                                                                                                                                                                      |   |               |    |                                                  |   |                                     |   |                                           |    |                                                     |   |       |    |                |
| 29 | no_surgeries                                                                                                                              | Number of surgeries due to NEC/FIP | dropdown <table border="1"> <tr> <td>0</td> <td>no</td> </tr> <tr> <td>1</td> <td>1x</td> </tr> <tr> <td>2</td> <td>2x</td> </tr> <tr> <td>3</td> <td>&gt;2x</td> </tr> <tr> <td>99</td> <td>unknown</td> </tr> </table>                                                                                                                                                                                                                                                             | 0 | no            | 1  | 1x                                               | 2 | 2x                                  | 3 | >2x                                       | 99 | unknown                                             |   |       |    |                |
| 0  | no                                                                                                                                        |                                    |                                                                                                                                                                                                                                                                                                                                                                                                                                                                                      |   |               |    |                                                  |   |                                     |   |                                           |    |                                                     |   |       |    |                |
| 1  | 1x                                                                                                                                        |                                    |                                                                                                                                                                                                                                                                                                                                                                                                                                                                                      |   |               |    |                                                  |   |                                     |   |                                           |    |                                                     |   |       |    |                |
| 2  | 2x                                                                                                                                        |                                    |                                                                                                                                                                                                                                                                                                                                                                                                                                                                                      |   |               |    |                                                  |   |                                     |   |                                           |    |                                                     |   |       |    |                |
| 3  | >2x                                                                                                                                       |                                    |                                                                                                                                                                                                                                                                                                                                                                                                                                                                                      |   |               |    |                                                  |   |                                     |   |                                           |    |                                                     |   |       |    |                |
| 99 | unknown                                                                                                                                   |                                    |                                                                                                                                                                                                                                                                                                                                                                                                                                                                                      |   |               |    |                                                  |   |                                     |   |                                           |    |                                                     |   |       |    |                |
| 30 | date_necsurg1<br>Show the field ONLY if:<br>[no_surgeries] = '1' or [no_surgeries] = '2' or [no_surgeries] = '3' or [no_surgeries] = '9'  | Date of 1st NEC surgery            | text (date_dmy)                                                                                                                                                                                                                                                                                                                                                                                                                                                                      |   |               |    |                                                  |   |                                     |   |                                           |    |                                                     |   |       |    |                |
| 31 | surg1_approach<br>Show the field ONLY if:<br>[no_surgeries] = '1' or [no_surgeries] = '2' or [no_surgeries] = '3' or [no_surgeries] = '9' | 1st NEC surgery: surgical approach | dropdown <table border="1"> <tr> <td>1</td> <td>only drainage</td> </tr> <tr> <td>2</td> <td>laparotomy without intestinal incision/resection</td> </tr> <tr> <td>3</td> <td>Laparotomy with resection and stoma</td> </tr> <tr> <td>4</td> <td>Laparotomy with resection and anastomosis</td> </tr> <tr> <td>5</td> <td>Laparotomy with resection and anastomosis and stoma</td> </tr> <tr> <td>6</td> <td>other</td> </tr> <tr> <td>88</td> <td>not applicable</td> </tr> </table> | 1 | only drainage | 2  | laparotomy without intestinal incision/resection | 3 | Laparotomy with resection and stoma | 4 | Laparotomy with resection and anastomosis | 5  | Laparotomy with resection and anastomosis and stoma | 6 | other | 88 | not applicable |
| 1  | only drainage                                                                                                                             |                                    |                                                                                                                                                                                                                                                                                                                                                                                                                                                                                      |   |               |    |                                                  |   |                                     |   |                                           |    |                                                     |   |       |    |                |
| 2  | laparotomy without intestinal incision/resection                                                                                          |                                    |                                                                                                                                                                                                                                                                                                                                                                                                                                                                                      |   |               |    |                                                  |   |                                     |   |                                           |    |                                                     |   |       |    |                |
| 3  | Laparotomy with resection and stoma                                                                                                       |                                    |                                                                                                                                                                                                                                                                                                                                                                                                                                                                                      |   |               |    |                                                  |   |                                     |   |                                           |    |                                                     |   |       |    |                |
| 4  | Laparotomy with resection and anastomosis                                                                                                 |                                    |                                                                                                                                                                                                                                                                                                                                                                                                                                                                                      |   |               |    |                                                  |   |                                     |   |                                           |    |                                                     |   |       |    |                |
| 5  | Laparotomy with resection and anastomosis and stoma                                                                                       |                                    |                                                                                                                                                                                                                                                                                                                                                                                                                                                                                      |   |               |    |                                                  |   |                                     |   |                                           |    |                                                     |   |       |    |                |
| 6  | other                                                                                                                                     |                                    |                                                                                                                                                                                                                                                                                                                                                                                                                                                                                      |   |               |    |                                                  |   |                                     |   |                                           |    |                                                     |   |       |    |                |
| 88 | not applicable                                                                                                                            |                                    |                                                                                                                                                                                                                                                                                                                                                                                                                                                                                      |   |               |    |                                                  |   |                                     |   |                                           |    |                                                     |   |       |    |                |

|    |                                                                                                                                                              |                                                                                  |                                                                                                                                                                                                                                                                                                                                                                                                                                                                                   |   |                 |                  |   |                 |                             |   |                 |             |   |                 |       |   |                 |              |    |                  |         |
|----|--------------------------------------------------------------------------------------------------------------------------------------------------------------|----------------------------------------------------------------------------------|-----------------------------------------------------------------------------------------------------------------------------------------------------------------------------------------------------------------------------------------------------------------------------------------------------------------------------------------------------------------------------------------------------------------------------------------------------------------------------------|---|-----------------|------------------|---|-----------------|-----------------------------|---|-----------------|-------------|---|-----------------|-------|---|-----------------|--------------|----|------------------|---------|
|    |                                                                                                                                                              |                                                                                  | 99 unknown                                                                                                                                                                                                                                                                                                                                                                                                                                                                        |   |                 |                  |   |                 |                             |   |                 |             |   |                 |       |   |                 |              |    |                  |         |
| 32 | <p>surg1_desc_appr</p> <p>Show the field ONLY if:</p> <p>[no_surgeries] = '1' or [no_surgeries] = '2' or [no_surgeries] = '3' or [no_surgeries] = '9'</p>    | <p>1st NEC surgery: description of surgical approach</p> <p><i>free text</i></p> | notes                                                                                                                                                                                                                                                                                                                                                                                                                                                                             |   |                 |                  |   |                 |                             |   |                 |             |   |                 |       |   |                 |              |    |                  |         |
| 33 | <p>surg1_reason</p> <p>Show the field ONLY if:</p> <p>[no_surgeries] = '1' or [no_surgeries] = '2' or [no_surgeries] = '3' or [no_surgeries] = '9'</p>       | Reason for 1st surgery                                                           | <p>checkbox</p> <table border="1"> <tr> <td>1</td> <td>surg1_reason__1</td> <td>fast-progression</td> </tr> <tr> <td>2</td> <td>surg1_reason__2</td> <td>passage problem/obstruction</td> </tr> <tr> <td>3</td> <td>surg1_reason__3</td> <td>perforation</td> </tr> <tr> <td>4</td> <td>surg1_reason__4</td> <td>Other</td> </tr> <tr> <td>5</td> <td>surg1_reason__5</td> <td>complication</td> </tr> <tr> <td>99</td> <td>surg1_reason__99</td> <td>unknown</td> </tr> </table> | 1 | surg1_reason__1 | fast-progression | 2 | surg1_reason__2 | passage problem/obstruction | 3 | surg1_reason__3 | perforation | 4 | surg1_reason__4 | Other | 5 | surg1_reason__5 | complication | 99 | surg1_reason__99 | unknown |
| 1  | surg1_reason__1                                                                                                                                              | fast-progression                                                                 |                                                                                                                                                                                                                                                                                                                                                                                                                                                                                   |   |                 |                  |   |                 |                             |   |                 |             |   |                 |       |   |                 |              |    |                  |         |
| 2  | surg1_reason__2                                                                                                                                              | passage problem/obstruction                                                      |                                                                                                                                                                                                                                                                                                                                                                                                                                                                                   |   |                 |                  |   |                 |                             |   |                 |             |   |                 |       |   |                 |              |    |                  |         |
| 3  | surg1_reason__3                                                                                                                                              | perforation                                                                      |                                                                                                                                                                                                                                                                                                                                                                                                                                                                                   |   |                 |                  |   |                 |                             |   |                 |             |   |                 |       |   |                 |              |    |                  |         |
| 4  | surg1_reason__4                                                                                                                                              | Other                                                                            |                                                                                                                                                                                                                                                                                                                                                                                                                                                                                   |   |                 |                  |   |                 |                             |   |                 |             |   |                 |       |   |                 |              |    |                  |         |
| 5  | surg1_reason__5                                                                                                                                              | complication                                                                     |                                                                                                                                                                                                                                                                                                                                                                                                                                                                                   |   |                 |                  |   |                 |                             |   |                 |             |   |                 |       |   |                 |              |    |                  |         |
| 99 | surg1_reason__99                                                                                                                                             | unknown                                                                          |                                                                                                                                                                                                                                                                                                                                                                                                                                                                                   |   |                 |                  |   |                 |                             |   |                 |             |   |                 |       |   |                 |              |    |                  |         |
| 34 | <p>surg1_reason_other</p> <p>Show the field ONLY if:</p> <p>[no_surgeries] = '2' or [no_surgeries] = '3' or [no_surgeries] = '1' or [no_surgeries] = '9'</p> | <p>Other reason for 1st surgery</p> <p><i>free text</i></p>                      | notes                                                                                                                                                                                                                                                                                                                                                                                                                                                                             |   |                 |                  |   |                 |                             |   |                 |             |   |                 |       |   |                 |              |    |                  |         |
| 35 | <p>date_necsurg2</p> <p>Show the field ONLY if:</p>                                                                                                          | Date of 2nd NEC surgery                                                          | text (date_dmy)                                                                                                                                                                                                                                                                                                                                                                                                                                                                   |   |                 |                  |   |                 |                             |   |                 |             |   |                 |       |   |                 |              |    |                  |         |

|    |                                                                                                                          |                                                                             |                                                                                                                                                                                                                                                                                                                                                                                                                               |   |                 |        |                                                  |                 |                                     |   |                                           |              |       |                 |                |    |                 |               |    |                  |         |
|----|--------------------------------------------------------------------------------------------------------------------------|-----------------------------------------------------------------------------|-------------------------------------------------------------------------------------------------------------------------------------------------------------------------------------------------------------------------------------------------------------------------------------------------------------------------------------------------------------------------------------------------------------------------------|---|-----------------|--------|--------------------------------------------------|-----------------|-------------------------------------|---|-------------------------------------------|--------------|-------|-----------------|----------------|----|-----------------|---------------|----|------------------|---------|
|    | [no_surgeries] = '2'<br>or [no_surgeries] = '3'<br>or [no_surgeries] = '9'                                               |                                                                             |                                                                                                                                                                                                                                                                                                                                                                                                                               |   |                 |        |                                                  |                 |                                     |   |                                           |              |       |                 |                |    |                 |               |    |                  |         |
| 36 | surg2_approach<br>Show the field ONLY if:<br>[no_surgeries] = '2'<br>or [no_surgeries] = '3'<br>or [no_surgeries] = '9'  | 2nd NEC surgery: surgical approach                                          | dropdown<br><table border="1"> <tr><td>1</td><td>only drainage</td></tr> <tr><td>2</td><td>laparotomy without intestinal incision/resection</td></tr> <tr><td>3</td><td>Laparotomy with resection and stoma</td></tr> <tr><td>4</td><td>Laparotomy with resection and anastomosis</td></tr> <tr><td>5</td><td>other</td></tr> <tr><td>88</td><td>not applicable</td></tr> <tr><td>99</td><td>unknown</td></tr> </table>       | 1 | only drainage   | 2      | laparotomy without intestinal incision/resection | 3               | Laparotomy with resection and stoma | 4 | Laparotomy with resection and anastomosis | 5            | other | 88              | not applicable | 99 | unknown         |               |    |                  |         |
| 1  | only drainage                                                                                                            |                                                                             |                                                                                                                                                                                                                                                                                                                                                                                                                               |   |                 |        |                                                  |                 |                                     |   |                                           |              |       |                 |                |    |                 |               |    |                  |         |
| 2  | laparotomy without intestinal incision/resection                                                                         |                                                                             |                                                                                                                                                                                                                                                                                                                                                                                                                               |   |                 |        |                                                  |                 |                                     |   |                                           |              |       |                 |                |    |                 |               |    |                  |         |
| 3  | Laparotomy with resection and stoma                                                                                      |                                                                             |                                                                                                                                                                                                                                                                                                                                                                                                                               |   |                 |        |                                                  |                 |                                     |   |                                           |              |       |                 |                |    |                 |               |    |                  |         |
| 4  | Laparotomy with resection and anastomosis                                                                                |                                                                             |                                                                                                                                                                                                                                                                                                                                                                                                                               |   |                 |        |                                                  |                 |                                     |   |                                           |              |       |                 |                |    |                 |               |    |                  |         |
| 5  | other                                                                                                                    |                                                                             |                                                                                                                                                                                                                                                                                                                                                                                                                               |   |                 |        |                                                  |                 |                                     |   |                                           |              |       |                 |                |    |                 |               |    |                  |         |
| 88 | not applicable                                                                                                           |                                                                             |                                                                                                                                                                                                                                                                                                                                                                                                                               |   |                 |        |                                                  |                 |                                     |   |                                           |              |       |                 |                |    |                 |               |    |                  |         |
| 99 | unknown                                                                                                                  |                                                                             |                                                                                                                                                                                                                                                                                                                                                                                                                               |   |                 |        |                                                  |                 |                                     |   |                                           |              |       |                 |                |    |                 |               |    |                  |         |
| 37 | surg2_desc_appr<br>Show the field ONLY if:<br>[no_surgeries] = '2'<br>or [no_surgeries] = '3'<br>or [no_surgeries] = '9' | 2nd NEC surgery: description of other surgical approach<br><i>free text</i> | notes                                                                                                                                                                                                                                                                                                                                                                                                                         |   |                 |        |                                                  |                 |                                     |   |                                           |              |       |                 |                |    |                 |               |    |                  |         |
| 38 | surg2_reason<br>Show the field ONLY if:<br>[no_surgeries] = '2'<br>or [no_surgeries] = '3'<br>or [no_surgeries] = '9'    | Reason for 2nd surgery                                                      | checkbox<br><table border="1"> <tr><td>1</td><td>surg2_reason__1</td><td>re-NEC</td></tr> <tr><td>2</td><td>surg2_reason__2</td><td>second look</td></tr> <tr><td>3</td><td>surg2_reason__3</td><td>complication</td></tr> <tr><td>4</td><td>surg2_reason__4</td><td>Other</td></tr> <tr><td>5</td><td>surg2_reason__5</td><td>Stoma closure</td></tr> <tr><td>99</td><td>surg2_reason__99</td><td>unknown</td></tr> </table> | 1 | surg2_reason__1 | re-NEC | 2                                                | surg2_reason__2 | second look                         | 3 | surg2_reason__3                           | complication | 4     | surg2_reason__4 | Other          | 5  | surg2_reason__5 | Stoma closure | 99 | surg2_reason__99 | unknown |
| 1  | surg2_reason__1                                                                                                          | re-NEC                                                                      |                                                                                                                                                                                                                                                                                                                                                                                                                               |   |                 |        |                                                  |                 |                                     |   |                                           |              |       |                 |                |    |                 |               |    |                  |         |
| 2  | surg2_reason__2                                                                                                          | second look                                                                 |                                                                                                                                                                                                                                                                                                                                                                                                                               |   |                 |        |                                                  |                 |                                     |   |                                           |              |       |                 |                |    |                 |               |    |                  |         |
| 3  | surg2_reason__3                                                                                                          | complication                                                                |                                                                                                                                                                                                                                                                                                                                                                                                                               |   |                 |        |                                                  |                 |                                     |   |                                           |              |       |                 |                |    |                 |               |    |                  |         |
| 4  | surg2_reason__4                                                                                                          | Other                                                                       |                                                                                                                                                                                                                                                                                                                                                                                                                               |   |                 |        |                                                  |                 |                                     |   |                                           |              |       |                 |                |    |                 |               |    |                  |         |
| 5  | surg2_reason__5                                                                                                          | Stoma closure                                                               |                                                                                                                                                                                                                                                                                                                                                                                                                               |   |                 |        |                                                  |                 |                                     |   |                                           |              |       |                 |                |    |                 |               |    |                  |         |
| 99 | surg2_reason__99                                                                                                         | unknown                                                                     |                                                                                                                                                                                                                                                                                                                                                                                                                               |   |                 |        |                                                  |                 |                                     |   |                                           |              |       |                 |                |    |                 |               |    |                  |         |

|    |                                                                                                                            |                                                                       |                                                                                                                                                                                                                                                                                                                                                                                                                                           |   |               |   |                                                  |   |                                     |   |                                           |   |       |    |                |    |         |
|----|----------------------------------------------------------------------------------------------------------------------------|-----------------------------------------------------------------------|-------------------------------------------------------------------------------------------------------------------------------------------------------------------------------------------------------------------------------------------------------------------------------------------------------------------------------------------------------------------------------------------------------------------------------------------|---|---------------|---|--------------------------------------------------|---|-------------------------------------|---|-------------------------------------------|---|-------|----|----------------|----|---------|
| 39 | surg2_reason_desc<br>Show the field ONLY if:<br>[no_surgeries] = '2'<br>or [no_surgeries] = '3'<br>or [no_surgeries] = '9' | Reason for 2nd surgery (details, other...)<br><i>free text</i>        | notes                                                                                                                                                                                                                                                                                                                                                                                                                                     |   |               |   |                                                  |   |                                     |   |                                           |   |       |    |                |    |         |
| 40 | date_necsur3<br>Show the field ONLY if:<br>[no_surgeries] = '3'<br>or [no_surgeries] = '9'                                 | Date of 3rd NEC surgery                                               | text (date_dmy)                                                                                                                                                                                                                                                                                                                                                                                                                           |   |               |   |                                                  |   |                                     |   |                                           |   |       |    |                |    |         |
| 41 | surg3_approach<br>Show the field ONLY if:<br>[no_surgeries] = '3'<br>or [no_surgeries] = '9'                               | 3rd NEC surgery: surgical approach                                    | dropdown <table border="1"> <tr> <td>1</td> <td>only drainage</td> </tr> <tr> <td>2</td> <td>laparotomy without intestinal incision/resection</td> </tr> <tr> <td>3</td> <td>Laparotomy with resection and stoma</td> </tr> <tr> <td>4</td> <td>Laparotomy with resection and anastomosis</td> </tr> <tr> <td>5</td> <td>other</td> </tr> <tr> <td>88</td> <td>not applicable</td> </tr> <tr> <td>99</td> <td>unknown</td> </tr> </table> | 1 | only drainage | 2 | laparotomy without intestinal incision/resection | 3 | Laparotomy with resection and stoma | 4 | Laparotomy with resection and anastomosis | 5 | other | 88 | not applicable | 99 | unknown |
| 1  | only drainage                                                                                                              |                                                                       |                                                                                                                                                                                                                                                                                                                                                                                                                                           |   |               |   |                                                  |   |                                     |   |                                           |   |       |    |                |    |         |
| 2  | laparotomy without intestinal incision/resection                                                                           |                                                                       |                                                                                                                                                                                                                                                                                                                                                                                                                                           |   |               |   |                                                  |   |                                     |   |                                           |   |       |    |                |    |         |
| 3  | Laparotomy with resection and stoma                                                                                        |                                                                       |                                                                                                                                                                                                                                                                                                                                                                                                                                           |   |               |   |                                                  |   |                                     |   |                                           |   |       |    |                |    |         |
| 4  | Laparotomy with resection and anastomosis                                                                                  |                                                                       |                                                                                                                                                                                                                                                                                                                                                                                                                                           |   |               |   |                                                  |   |                                     |   |                                           |   |       |    |                |    |         |
| 5  | other                                                                                                                      |                                                                       |                                                                                                                                                                                                                                                                                                                                                                                                                                           |   |               |   |                                                  |   |                                     |   |                                           |   |       |    |                |    |         |
| 88 | not applicable                                                                                                             |                                                                       |                                                                                                                                                                                                                                                                                                                                                                                                                                           |   |               |   |                                                  |   |                                     |   |                                           |   |       |    |                |    |         |
| 99 | unknown                                                                                                                    |                                                                       |                                                                                                                                                                                                                                                                                                                                                                                                                                           |   |               |   |                                                  |   |                                     |   |                                           |   |       |    |                |    |         |
| 42 | surg3_desc_appr<br>Show the field ONLY if:<br>[no_surgeries] = '3'<br>or [no_surgeries] = '9'                              | 3rd NEC surgery: description of surgical approach<br><i>free text</i> | notes                                                                                                                                                                                                                                                                                                                                                                                                                                     |   |               |   |                                                  |   |                                     |   |                                           |   |       |    |                |    |         |
| 43 | surg3_reason                                                                                                               | Reason for 3rd surgery                                                | checkbox                                                                                                                                                                                                                                                                                                                                                                                                                                  |   |               |   |                                                  |   |                                     |   |                                           |   |       |    |                |    |         |



|    |                                                                                                 |                                                                                                                                     |                                                                                                                                                                                                                                                                                                                                                                                                                                           |   |                 |        |     |                 |                |   |                 |              |   |                 |       |   |                 |               |    |                  |         |
|----|-------------------------------------------------------------------------------------------------|-------------------------------------------------------------------------------------------------------------------------------------|-------------------------------------------------------------------------------------------------------------------------------------------------------------------------------------------------------------------------------------------------------------------------------------------------------------------------------------------------------------------------------------------------------------------------------------------|---|-----------------|--------|-----|-----------------|----------------|---|-----------------|--------------|---|-----------------|-------|---|-----------------|---------------|----|------------------|---------|
|    | Show the field ONLY if:<br>[no_surgeries] = '3'<br>or [no_surgeries] = '9'                      |                                                                                                                                     | <table border="1"> <tr> <td>1</td> <td>surg3_reason__1</td> <td>re-NEC</td> </tr> <tr> <td>2</td> <td>surg3_reason__2</td> <td>second look</td> </tr> <tr> <td>3</td> <td>surg3_reason__3</td> <td>complication</td> </tr> <tr> <td>4</td> <td>surg3_reason__4</td> <td>Other</td> </tr> <tr> <td>5</td> <td>surg3_reason__5</td> <td>Stoma closure</td> </tr> <tr> <td>99</td> <td>surg3_reason__99</td> <td>unknown</td> </tr> </table> | 1 | surg3_reason__1 | re-NEC | 2   | surg3_reason__2 | second look    | 3 | surg3_reason__3 | complication | 4 | surg3_reason__4 | Other | 5 | surg3_reason__5 | Stoma closure | 99 | surg3_reason__99 | unknown |
| 1  | surg3_reason__1                                                                                 | re-NEC                                                                                                                              |                                                                                                                                                                                                                                                                                                                                                                                                                                           |   |                 |        |     |                 |                |   |                 |              |   |                 |       |   |                 |               |    |                  |         |
| 2  | surg3_reason__2                                                                                 | second look                                                                                                                         |                                                                                                                                                                                                                                                                                                                                                                                                                                           |   |                 |        |     |                 |                |   |                 |              |   |                 |       |   |                 |               |    |                  |         |
| 3  | surg3_reason__3                                                                                 | complication                                                                                                                        |                                                                                                                                                                                                                                                                                                                                                                                                                                           |   |                 |        |     |                 |                |   |                 |              |   |                 |       |   |                 |               |    |                  |         |
| 4  | surg3_reason__4                                                                                 | Other                                                                                                                               |                                                                                                                                                                                                                                                                                                                                                                                                                                           |   |                 |        |     |                 |                |   |                 |              |   |                 |       |   |                 |               |    |                  |         |
| 5  | surg3_reason__5                                                                                 | Stoma closure                                                                                                                       |                                                                                                                                                                                                                                                                                                                                                                                                                                           |   |                 |        |     |                 |                |   |                 |              |   |                 |       |   |                 |               |    |                  |         |
| 99 | surg3_reason__99                                                                                | unknown                                                                                                                             |                                                                                                                                                                                                                                                                                                                                                                                                                                           |   |                 |        |     |                 |                |   |                 |              |   |                 |       |   |                 |               |    |                  |         |
| 44 | surg3_reason_desc<br>Show the field ONLY if:<br>[no_surgeries] = '3'<br>or [no_surgeries] = '9' | Reason for 3rd surgery (details, other...)<br><i>free text</i>                                                                      | notes                                                                                                                                                                                                                                                                                                                                                                                                                                     |   |                 |        |     |                 |                |   |                 |              |   |                 |       |   |                 |               |    |                  |         |
| 45 | re_nec_1                                                                                        | Section Header: <i>Re-NEC</i><br>RE-NEC or Re-FIP (defined as recurrence of NEC when child is fully enteral nourished/ PEN stopped) | dropdown<br><table border="1"> <tr> <td>0</td> <td>no</td> </tr> <tr> <td>1</td> <td>yes</td> </tr> <tr> <td>99</td> <td>not documented</td> </tr> </table>                                                                                                                                                                                                                                                                               | 0 | no              | 1      | yes | 99              | not documented |   |                 |              |   |                 |       |   |                 |               |    |                  |         |
| 0  | no                                                                                              |                                                                                                                                     |                                                                                                                                                                                                                                                                                                                                                                                                                                           |   |                 |        |     |                 |                |   |                 |              |   |                 |       |   |                 |               |    |                  |         |
| 1  | yes                                                                                             |                                                                                                                                     |                                                                                                                                                                                                                                                                                                                                                                                                                                           |   |                 |        |     |                 |                |   |                 |              |   |                 |       |   |                 |               |    |                  |         |
| 99 | not documented                                                                                  |                                                                                                                                     |                                                                                                                                                                                                                                                                                                                                                                                                                                           |   |                 |        |     |                 |                |   |                 |              |   |                 |       |   |                 |               |    |                  |         |
| 46 | re_nec_com<br>Show the field ONLY if:<br>[re_nec_1] = '1'                                       | Re-NEC comment (date, bell stage and localization)<br><i>free text</i>                                                              | notes                                                                                                                                                                                                                                                                                                                                                                                                                                     |   |                 |        |     |                 |                |   |                 |              |   |                 |       |   |                 |               |    |                  |         |
| 47 | spont_perforation2<br>Show the field ONLY if:<br>[re_nec_1] = '1'                               | Re-NEC: Focal gastrointestinal perforation/spontaneous gastrointestinal perforation (separate from NEC!)                            | dropdown<br><table border="1"> <tr> <td>0</td> <td>no</td> </tr> <tr> <td>1</td> <td>yes</td> </tr> <tr> <td>99</td> <td>unknown</td> </tr> </table>                                                                                                                                                                                                                                                                                      | 0 | no              | 1      | yes | 99              | unknown        |   |                 |              |   |                 |       |   |                 |               |    |                  |         |
| 0  | no                                                                                              |                                                                                                                                     |                                                                                                                                                                                                                                                                                                                                                                                                                                           |   |                 |        |     |                 |                |   |                 |              |   |                 |       |   |                 |               |    |                  |         |
| 1  | yes                                                                                             |                                                                                                                                     |                                                                                                                                                                                                                                                                                                                                                                                                                                           |   |                 |        |     |                 |                |   |                 |              |   |                 |       |   |                 |               |    |                  |         |
| 99 | unknown                                                                                         |                                                                                                                                     |                                                                                                                                                                                                                                                                                                                                                                                                                                           |   |                 |        |     |                 |                |   |                 |              |   |                 |       |   |                 |               |    |                  |         |
| 48 | init_symptoms_date<br>2                                                                         | Initial symptoms date of 2nd NEC<br><i>dd.mm.yyyy</i>                                                                               | text (date_dmy)                                                                                                                                                                                                                                                                                                                                                                                                                           |   |                 |        |     |                 |                |   |                 |              |   |                 |       |   |                 |               |    |                  |         |

|    |                                                                     |                                                                                  |                                                                                                                                                                                                                                                                                                                           |   |        |    |         |    |         |    |         |    |         |    |                |    |         |
|----|---------------------------------------------------------------------|----------------------------------------------------------------------------------|---------------------------------------------------------------------------------------------------------------------------------------------------------------------------------------------------------------------------------------------------------------------------------------------------------------------------|---|--------|----|---------|----|---------|----|---------|----|---------|----|----------------|----|---------|
|    | Show the field ONLY<br>if:<br>[re_nec_1] = '1'                      |                                                                                  |                                                                                                                                                                                                                                                                                                                           |   |        |    |         |    |         |    |         |    |         |    |                |    |         |
| 49 | dx_date2<br>Show the field ONLY<br>if:<br>[re_nec_1] = '1'          | 2nd NEC: Date at Diagnosis (start NPO)                                           | text (date_dmy, Min: 01.01.1970, Max: 31.12.2050)                                                                                                                                                                                                                                                                         |   |        |    |         |    |         |    |         |    |         |    |                |    |         |
| 50 | age_at_diagnosis2<br>Show the field ONLY<br>if:<br>[re_nec_1] = '1' | 2nd NEC: Age at diagnoses (calculated)<br><i>calculated field; no data entry</i> | calc<br>Calculation:<br>datediff([patient_dob],[dx_date2],"d","dmy")                                                                                                                                                                                                                                                      |   |        |    |         |    |         |    |         |    |         |    |                |    |         |
| 51 | bell2<br>Show the field ONLY<br>if:<br>[re_nec_1] = '1'             | 2nd NEC: Bell staging (max grade)- always report worst grading during disease    | dropdown, Required<br><table border="1"> <tr><td>1</td><td>stad 1</td></tr> <tr><td>21</td><td>stad 2a</td></tr> <tr><td>22</td><td>stad 2b</td></tr> <tr><td>31</td><td>stad 3a</td></tr> <tr><td>32</td><td>stad 3b</td></tr> <tr><td>88</td><td>not applicable</td></tr> <tr><td>99</td><td>unknown</td></tr> </table> | 1 | stad 1 | 21 | stad 2a | 22 | stad 2b | 31 | stad 3a | 32 | stad 3b | 88 | not applicable | 99 | unknown |
| 1  | stad 1                                                              |                                                                                  |                                                                                                                                                                                                                                                                                                                           |   |        |    |         |    |         |    |         |    |         |    |                |    |         |
| 21 | stad 2a                                                             |                                                                                  |                                                                                                                                                                                                                                                                                                                           |   |        |    |         |    |         |    |         |    |         |    |                |    |         |
| 22 | stad 2b                                                             |                                                                                  |                                                                                                                                                                                                                                                                                                                           |   |        |    |         |    |         |    |         |    |         |    |                |    |         |
| 31 | stad 3a                                                             |                                                                                  |                                                                                                                                                                                                                                                                                                                           |   |        |    |         |    |         |    |         |    |         |    |                |    |         |
| 32 | stad 3b                                                             |                                                                                  |                                                                                                                                                                                                                                                                                                                           |   |        |    |         |    |         |    |         |    |         |    |                |    |         |
| 88 | not applicable                                                      |                                                                                  |                                                                                                                                                                                                                                                                                                                           |   |        |    |         |    |         |    |         |    |         |    |                |    |         |
| 99 | unknown                                                             |                                                                                  |                                                                                                                                                                                                                                                                                                                           |   |        |    |         |    |         |    |         |    |         |    |                |    |         |
| 52 | conserv2<br>Show the field ONLY<br>if:<br>[re_nec_1] = '1'          | 2nd NEC: Conservative treatment only                                             | dropdown (autocomplete)<br><table border="1"> <tr><td>0</td><td>no</td></tr> <tr><td>1</td><td>yes</td></tr> <tr><td>99</td><td>unknown</td></tr> </table>                                                                                                                                                                | 0 | no     | 1  | yes     | 99 | unknown |    |         |    |         |    |                |    |         |
| 0  | no                                                                  |                                                                                  |                                                                                                                                                                                                                                                                                                                           |   |        |    |         |    |         |    |         |    |         |    |                |    |         |
| 1  | yes                                                                 |                                                                                  |                                                                                                                                                                                                                                                                                                                           |   |        |    |         |    |         |    |         |    |         |    |                |    |         |
| 99 | unknown                                                             |                                                                                  |                                                                                                                                                                                                                                                                                                                           |   |        |    |         |    |         |    |         |    |         |    |                |    |         |
| 53 | pen_stop_renec                                                      | PEN stopped on                                                                   | text (date_dmy)                                                                                                                                                                                                                                                                                                           |   |        |    |         |    |         |    |         |    |         |    |                |    |         |
| 54 | complications_core                                                  | Section Header: <i>Outcomes</i><br>Complications<br><i>free text</i>             | notes                                                                                                                                                                                                                                                                                                                     |   |        |    |         |    |         |    |         |    |         |    |                |    |         |

|    |                                                                   |                                                                                    |                                                                                                                                                                                 |   |    |   |     |    |         |    |         |
|----|-------------------------------------------------------------------|------------------------------------------------------------------------------------|---------------------------------------------------------------------------------------------------------------------------------------------------------------------------------|---|----|---|-----|----|---------|----|---------|
| 55 | survival                                                          | Survival: last known status                                                        | dropdown<br><table border="1"> <tr><td>0</td><td>no</td></tr> <tr><td>1</td><td>yes</td></tr> <tr><td>99</td><td>unknown</td></tr> </table>                                     | 0 | no | 1 | yes | 99 | unknown |    |         |
| 0  | no                                                                |                                                                                    |                                                                                                                                                                                 |   |    |   |     |    |         |    |         |
| 1  | yes                                                               |                                                                                    |                                                                                                                                                                                 |   |    |   |     |    |         |    |         |
| 99 | unknown                                                           |                                                                                    |                                                                                                                                                                                 |   |    |   |     |    |         |    |         |
| 56 | date_knownalive                                                   | Last date known alive (date of last report)                                        | text (date_dmy)                                                                                                                                                                 |   |    |   |     |    |         |    |         |
| 57 | died_duetonec<br>Show the field ONLY<br>if:<br>[survival] = '0'   | Died due to NEC                                                                    | dropdown<br><table border="1"> <tr><td>0</td><td>no</td></tr> <tr><td>1</td><td>yes</td></tr> <tr><td>2</td><td>unclear</td></tr> <tr><td>99</td><td>unknown</td></tr> </table> | 0 | no | 1 | yes | 2  | unclear | 99 | unknown |
| 0  | no                                                                |                                                                                    |                                                                                                                                                                                 |   |    |   |     |    |         |    |         |
| 1  | yes                                                               |                                                                                    |                                                                                                                                                                                 |   |    |   |     |    |         |    |         |
| 2  | unclear                                                           |                                                                                    |                                                                                                                                                                                 |   |    |   |     |    |         |    |         |
| 99 | unknown                                                           |                                                                                    |                                                                                                                                                                                 |   |    |   |     |    |         |    |         |
| 58 | exit_cause_desc<br>Show the field ONLY<br>if:<br>[survival] = '0' | Death cause description<br><i>free text</i>                                        | notes                                                                                                                                                                           |   |    |   |     |    |         |    |         |
| 59 | exitus_date<br>Show the field ONLY<br>if:<br>[survival] = '0'     | Exitus date                                                                        | text (date_dmy)                                                                                                                                                                 |   |    |   |     |    |         |    |         |
| 60 | discharge_date_hospital                                           | Date of first discharge to other hospital                                          | text (date_dmy)                                                                                                                                                                 |   |    |   |     |    |         |    |         |
| 61 | discharge_home                                                    | Date of discharge home                                                             | text (date_dmy)                                                                                                                                                                 |   |    |   |     |    |         |    |         |
| 62 | hosp_duration                                                     | Hospitalisation duration<br><i>no need to input - calculated externally!</i>       | text (integer)<br>Field Annotation: From birth to first discharge or if re-NEC, duration of the last hospitalisation                                                            |   |    |   |     |    |         |    |         |
| 63 | total_hosp_duration                                               | Total hospitalisation duration<br><i>no need to input - calculated externally!</i> | text (integer)                                                                                                                                                                  |   |    |   |     |    |         |    |         |

|    |                    |                                                 |                                                                                                                                                                                                                                                                                                                                                                       |   |            |   |            |   |          |
|----|--------------------|-------------------------------------------------|-----------------------------------------------------------------------------------------------------------------------------------------------------------------------------------------------------------------------------------------------------------------------------------------------------------------------------------------------------------------------|---|------------|---|------------|---|----------|
| 64 | core_data_complete | Section Header: <i>Form Status</i><br>Complete? | dropdown <table border="1" data-bbox="1496 236 1668 384"><tr><td data-bbox="1496 236 1534 284">0</td><td data-bbox="1534 236 1668 284">Incomplete</td></tr><tr><td data-bbox="1496 284 1534 331">1</td><td data-bbox="1534 284 1668 331">Unverified</td></tr><tr><td data-bbox="1496 331 1534 384">2</td><td data-bbox="1534 331 1668 384">Complete</td></tr></table> | 0 | Incomplete | 1 | Unverified | 2 | Complete |
| 0  | Incomplete         |                                                 |                                                                                                                                                                                                                                                                                                                                                                       |   |            |   |            |   |          |
| 1  | Unverified         |                                                 |                                                                                                                                                                                                                                                                                                                                                                       |   |            |   |            |   |          |
| 2  | Complete           |                                                 |                                                                                                                                                                                                                                                                                                                                                                       |   |            |   |            |   |          |
