# Supplementary material for: Risk factors for mortality in preterm infants with necrotizing enterocolitis: a retrospective multicenter analysis
Source: Springer Nature journal article supplement (doi:10.1007/s00431-021-04266-x), 2021-10-12
Supplement: MOESM2 [file 19751074]

# Supplementary Tables

Table I: Clinical parameters

| Variable                                   | N   | Total            | Survivors        | Non-Survivors    | P      | Bell III         | Bell II          | P      |
|--------------------------------------------|-----|------------------|------------------|------------------|--------|------------------|------------------|--------|
| N                                          | 157 |                  | 129              | 28               |        | 44               | 113              |        |
| Birth weight [g] (IQR)                     | 157 | 1405 (960)       | 1480 (750)       | 855 (955)        | 0.0017 | 1045 (894)       | 1500 (790)       | 0.0022 |
| Birth weight percentile (IQR)              | 157 | 27 (41)          | 25 (43)          | 32 (24)          | 0.8    | 29.5 (36.2)      | 26 (41)          | 0.85   |
| Birth length [cm] (IQR)                    | 150 | 40.5 (9)         | 41 (7)           | 33.2 (6.75)      | <0.001 | 36.8 (8.62)      | 41 (7)           | 0.006  |
| Birth length percentile (IQR)              | 150 | 37 (41.8)        | 36.5 (45.5)      | 37.5 (30.8)      | 0.55   | 37 (31.2)        | 37 (46.2)        | 0.73   |
| Birth head circumference [cm] (IQR)        | 127 | 28 (6)           | 29 (5)           | 24 (3.5)         | <0.001 | 25 (4.5)         | 29 (5.25)        | 0.0029 |
| Birth head circumference percentile (IQR)  | 128 | 31 (37)          | 31.5 (41.2)      | 28 (36.8)        | 0.47   | 26 (33.5)        | 32 (42)          | 0.16   |
| Gestational age [weeks.days] (IQR)         | 157 | 31.2 (6.2)       | 32.0 (5.1)       | 27.0 (5.3)       | <0.001 | 28.2 (5.2)       | 32.0 (5.3)       | 0.0011 |
| Number of infants in this birth (IQR)      | 157 | 1 (1)            | 1 (1)            | 1 (1)            | 0.73   | 1 (1)            | 1 (1)            | 0.089  |
| Assisted delivery n (%)                    | 156 | 133/156, 85%     | 107/128, 84%     | 26/28, 93%       | 0.093  | 38/44, 86%       | 95/112, 85%      | 0.045  |
| Apgar 1 minute (IQR)                       | 154 | 6 (3)            | 6 (3)            | 3 (3)            | <0.001 | 5 (4)            | 6 (3)            | 0.0064 |
| Apgar 5 minutes (IQR)                      | 153 | 8 (2)            | 8 (2)            | 6 (3)            | <0.001 | 7 (2)            | 8 (2)            | 0.0043 |
| Apgar 10 minutes (IQR)                     | 151 | 9 (2)            | 9 (1)            | 7 (3)            | <0.001 | 8 (2)            | 9 (1)            | 0.0067 |
| Congenital heart disease n (%)             | 156 | 36/156, 23%      | 26/128, 20%      | 10/28, 36%       | 0.71   | 16/44, 36%       | 20/112, 18%      | 0.56   |
| PDA n (%)                                  | 156 | 60/156, 38%      | 40/128, 31%      | 20/28, 71%       | 0.75   | 26/44, 59%       | 34/112, 30%      | 0.88   |
| Congenital malformations or syndroms n (%) | 152 | 33/152, 22%      | 27/124, 22%      | 6/28, 21%        | 0.41   | 9/44, 20%        | 24/108, 22%      | 0.24   |
| Age at diagnosis (IQR)                     | 157 | 9 (12)           | 8 (11)           | 11 (13.2)        | 0.039  | 9 (9.25)         | 8 (14)           | 0.87   |
| Conservative treatment only n (%)          | 157 | 101/157, 64%     | 88/129, 68%      | 13/28, 46%       | 1      | 4/44, 9%         | 97/113, 86%      | 0.017  |
| NEC surgery n (%)                          | 157 | 56/157, 36%      | 41/129, 32%      | 15/28, 54%       | 1      | 40/44, 91%       | 16/113, 14%      | 0.017  |
| More than one surgery due to NEC n (%)     | 157 | 40/157, 25%      | 34/129, 26%      | 6/28, 21%        | 0.52   | 28/44, 64%       | 12/113, 11%      | 0.43   |
| Male gender n (%)                          | 157 | 85/157, 54%      | 71/129, 55%      | 14/28, 50%       | 1      | 26/44, 59%       | 59/113, 52%      | 1      |
| Year of birth (IQR)                        | 157 | 2011 (2007-2018) | 2011 (2007-2018) | 2012 (2007-2017) | 0.52   | 2012 (2007-2018) | 2011 (2007-2017) | 0.19   |
| Re-NEC n (%)                               | 156 | 8/156, 5%        | 7/128, 5%        | 1/28, 4%         | 0.0025 | 1/44, 2%         | 7/112, 6%        | <0.001 |

Table II: Laboratory parameters

| Variable                                                               | N   | Total         | Survivors    | Non-Survivors | P      | Bell III     | Bell II      | P      |
|------------------------------------------------------------------------|-----|---------------|--------------|---------------|--------|--------------|--------------|--------|
| Umbilical artery pH (IQR)                                              | 128 | 7.3 (0.09)    | 7.3 (0.0825) | 7.32 (0.11)   | 0.37   | 7.32 (0.07)  | 7.3 (0.09)   | 0.5    |
| Umbilical venous pH (IQR)                                              | 38  | 7.35 (0.0925) | 7.36 (0.076) | 7.34 (0.115)  | 0.31   | 7.35 (0.13)  | 7.35 (0.118) | 0.45   |
| Minimum Hb [g/l] before NEC onset (IQR)                                | 77  | 132 (52)      | 142 (50)     | 114 (40.2)    | 0.035  | 120 (61)     | 137 (49.5)   | 0.092  |
| Maximum Hb [g/l] before NEC onset (IQR)                                | 77  | 183 (32)      | 184 (33)     | 176 (15)      | 0.063  | 178 (36)     | 184 (30.5)   | 0.62   |
| Minimum Hb [g/l] <7 days before NEC onset (IQR)                        | 132 | 144 (53.5)    | 153 (53)     | 127 (29)      | 0.0029 | 140 (48)     | 148 (55.5)   | 0.28   |
| Minimum Hb [g/l] 1-2 weeks before NEC onset (IQR)                      | 76  | 145 (44.2)    | 144 (45.5)   | 147 (46)      | 0.82   | 143 (44.8)   | 145 (44.2)   | 0.7    |
| Hb at disease presentation [g/l] (IQR)                                 | 149 | 140 (50)      | 146 (49.2)   | 121 (29)      | <0.001 | 126 (45)     | 144 (48)     | 0.017  |
| Minimum Hb during NEC [g/l] (IQR)                                      | 150 | 114 (35)      | 119 (37)     | 103 (19)      | 0.025  | 102 (34)     | 122 (36)     | <0.001 |
| Minimum WBC [G/L] before NEC onset (IQR)                               | 75  | 7.4 (5.85)    | 7.71 (5.6)   | 5.3 (3.78)    | 0.016  | 7 (4.51)     | 7.42 (5.65)  | 0.77   |
| Maximum WBC [G/L] before NEC onset (IQR)                               | 75  | 15.3 (10.2)   | 15.3 (11)    | 15.3 (3.05)   | 0.95   | 14.3 (9.8)   | 15.7 (9.47)  | 0.71   |
| Minimum WBC [G/L] <7 days before NEC onset (IQR)                       | 120 | 9.53 (6.71)   | 9.4 (6.61)   | 10.9 (6.06)   | 0.81   | 9.49 (7.38)  | 9.54 (6.45)  | 0.86   |
| Maximum WBC [G/L] <7 days before NEC onset (IQR)                       | 120 | 13.8 (8.93)   | 13.2 (8.13)  | 15.6 (10.4)   | 0.049  | 14.7 (11.2)  | 13.1 (8.03)  | 0.19   |
| WBC at disease presentation [G/l] (IQR)                                | 149 | 9.53 (7.8)    | 9.48 (6.57)  | 11.6 (11.9)   | 0.43   | 9.98 (14)    | 9.53 (6.74)  | 0.74   |
| Maximum WBC [G/l] during NEC (IQR)                                     | 149 | 17 (13.2)     | 16.4 (13)    | 22 (16.7)     | 0.69   | 24.2 (14.4)  | 14.8 (11.2)  | 0.0011 |
| Minimum PLT [G/l] before NEC onset (IQR)                               | 74  | 164 (111)     | 169 (116)    | 97 (78)       | 0.015  | 146 (82)     | 169 (122)    | 0.22   |
| Minimum PLT [G/l] <7 days before NEC onset (IQR)                       | 120 | 198 (142)     | 210 (129)    | 178 (226)     | 0.19   | 174 (102)    | 223 (133)    | 0.057  |
| Minimum PLT at disease presentation [G/l] (IQR)                        | 148 | 214 (211)     | 222 (194)    | 116 (228)     | 0.011  | 156 (124)    | 255 (203)    | <0.001 |
| Minimum PLT [G/l] during NEC (IQR)                                     | 150 | 157 (172)     | 174 (168)    | 57 (133)      | 0.0024 | 49 (79)      | 193 (177)    | <0.001 |
| Maximum total bilirubin <7 days before NEC onset [mcmol/l] (IQR)       | 122 | 151 (75.5)    | 155 (74.5)   | 123 (58)      | 0.071  | 154 (70.2)   | 148 (74.8)   | 0.59   |
| Maximal lactate [mmol/l] before NEC onset (IQR)                        | 74  | 3 (2.27)      | 2.9 (1.9)    | 5.2 (4.3)     | 0.069  | 3.25 (2.62)  | 2.9 (1.95)   | 0.11   |
| Maximal lactate [mmol/l] <7 days before NEC onset (IQR)                | 72  | 2.5 (1.32)    | 2.4 (1.2)    | 2.8 (2.8)     | 0.17   | 2.75 (0.65)  | 2.4 (1.25)   | 0.056  |
| Lactate at disease presentation [mmol/L] (IQR)                         | 139 | 2.2 (2.1)     | 2.1 (1.8)    | 3.95 (4.38)   | 0.0078 | 4.05 (3.65)  | 1.9 (1.3)    | <0.001 |
| Maximum Lactate [mmol/l] during NEC (IQR)                              | 141 | 2.7 (2.5)     | 2.4 (2.1)    | 5.25 (5.85)   | <0.001 | 5.25 (4.05)  | 2.3 (1.8)    | <0.001 |
| Minimum pH before NEC onset (IQR)                                      | 72  | 7.21 (0.118)  | 7.21 (0.121) | 7.19 (0.101)  | 0.17   | 7.19 (0.161) | 7.21 (0.112) | 0.84   |
| Minimum pH <7 days before NEC onset (IQR)                              | 70  | 7.26 (0.166)  | 7.26 (0.15)  | 7.14 (0.157)  | 0.016  | 7.21 (0.198) | 7.26 (0.159) | 0.1    |
| Maximum CRP before NEC onset (IQR)                                     | 60  | 0 (8)         | 0 (7)        | 4 (32)        | 0.1    | 4 (9)        | 0 (7)        | 0.27   |
| Maximum CRP [mg/l] <7 days before NEC onset (IQR)                      | 49  | 0 (6)         | 0 (5.25)     | 0 (24.5)      | 0.4    | 0 (8.5)      | 0 (3)        | 0.49   |
| CRP at disease presentation [mg/L] (IQR)                               | 135 | 7 (19.5)      | 7 (18)       | 11 (33.5)     | 0.1    | 11 (26)      | 6.5 (18.2)   | 0.11   |
| Maximum CRP [mg/l] during NEC (IQR)                                    | 141 | 38 (97)       | 35 (103)     | 40.5 (66.5)   | 0.83   | 98 (126)     | 29.5 (71)    | <0.001 |
| Procalcitonin at disease presentation (IQR)                            | 1   | 0.65 (0)      | 0.65 (0)     | NA (NA)       | 1      | NA (NA)      | 0.65 (0)     | 1      |
| Maximum Procalcitonin during NEC [mcg/l] (IQR)                         | 2   | 0.78 (0.13)   | 0.78 (0.13)  | NA (NA)       | 1      | NA (NA)      | 0.78 (0.13)  | 1      |
| Percentage of premature WBC at disease onset [%] = I/T ratio (IQR)     | 2   | 16.5 (0.5)    | 16.5 (0.5)   | NA (NA)       | 1      | NA (NA)      | 16.5 (0.5)   | 1      |
| Maximum percentage of premature neutrophils at disease onset [%] (IQR) | 109 | 23 (30)       | 21 (30.5)    | 35.5 (30.2)   | 0.054  | 38 (28.2)    | 19 (28)      | <0.001 |
| Maximum percentage of premature WBC at disease onset [%] (IQR)         | 103 | 18 (21.5)     | 18 (20)      | 23 (23)       | 0.42   | 24 (19)      | 16 (20)      | 0.026  |
| Base excess at disease presentation [mmol/L] (IQR)                     | 136 | -2.4 (5.97)   | -2 (5.48)    | -7.9 (6.58)   | <0.001 | -6.4 (5.1)   | -1.8 (5.3)   | <0.001 |
| Maximum base excess during NEC [mmol/L] (IQR)                          | 140 | -3.9 (6.23)   | -3.1 (5.35)  | -10.8 (9.3)   | <0.001 | -8.9 (6.25)  | -2.9 (5)     | <0.001 |
| Maximum PTT after disease onset (IQR)                                  | 21  | 48.4 (25)     | 47.3 (22.1)  | 72 (35)       | 0.076  | 53.5 (22.5)  | 46.2 (23.2)  | 0.46   |
| Maximum INR during NEC (IQR)                                           | 38  | 1.34 (0.617)  | 1.2 (0.6)    | 1.7 (0.33)    | 0.024  | 1.7 (0.55)   | 1.17 (0.34)  | 0.0022 |

Table III: Univariate regression - risk of death

| Value                                | OR   | CI95%        | P      |
|--------------------------------------|------|--------------|--------|
| Bell III                             | 7.1  | 3 - 18       | <0.001 |
| Birth weight [g]                     | 1    | 1 - 1        | 0.0019 |
| Birth weight percentile              | 1    | 0.98 - 1     | 0.93   |
| Birth length [cm]                    | 0.83 | 0.75 - 0.91  | <0.001 |
| Birth length percentile              | 0.99 | 0.97 - 1     | 0.42   |
| Birth head circumference [cm]        | 0.78 | 0.67 - 0.9   | <0.001 |
| Birth head circumference percentile  | 0.99 | 0.97 - 1     | 0.44   |
| Gestational age [weeks.days]         | 0.97 | 0.95 - 0.99  | <0.001 |
| Number of infants in this birth      | 1.2  | 0.61 - 2.3   | 0.56   |
| Assisted delivery                    | 2.6  | 0.69 - 17    | 0.22   |
| Apgar 1 minute                       | 0.68 | 0.55 - 0.82  | <0.001 |
| Apgar 5 minutes                      | 0.68 | 0.54 - 0.84  | <0.001 |
| Apgar 10 minutes                     | 0.65 | 0.49 - 0.83  | <0.001 |
| Congenital heart disease             | 2.2  | 0.88 - 5.2   | 0.084  |
| PDA                                  | 5.5  | 2.3 - 14     | <0.001 |
| Congenital malformations or syndroms | 0.98 | 0.33 - 2.5   | 0.97   |
| Age at diagnosis                     | 1    | 1 - 1.1      | 0.013  |
| Conservative treatment only          | 0.4  | 0.17 - 0.93  | 0.032  |
| NEC surgery                          | 2.5  | 1.1 - 5.8    | 0.032  |
| More than one surgery due to NEC     | 0.76 | 0.26 - 1.9   | 0.59   |
| Male gender                          | 0.82 | 0.36 - 1.9   | 0.63   |
| Year of birth                        | 1    | 0.91 - 1.2   | 0.6    |
| Re-NEC                               | 0.64 | 0.034 - 3.8  | 0.68   |
| Umbilical artery pH                  | 6.5  | 0.034 - 2646 | 0.51   |
| Umbilical venous pH                  | 0.11 | 0 - 133      | 0.51   |

Table IV: Univariate regression - risk of death

| Value                                                            | OR     | CI95%       | P      |
|------------------------------------------------------------------|--------|-------------|--------|
| Minimum Hb [g/l] before NEC onset                                | 0.98   | 0.96 - 1    | 0.049  |
| Maximum Hb [g/l] before NEC onset                                | 0.99   | 0.97 - 1    | 0.34   |
| Minimum Hb [g/l] <7 days before NEC onset                        | 0.98   | 0.97 - 0.99 | 0.0065 |
| Minimum Hb [g/l] 1-2 weeks before NEC onset                      | 1      | 0.98 - 1    | 0.88   |
| Hb at disease presentation [g/l]                                 | 0.97   | 0.95 - 0.99 | <0.001 |
| Minimum Hb during NEC [g/l]                                      | 0.98   | 0.96 - 0.99 | 0.019  |
| Minimum WBC [G/L] before NEC onset                               | 0.78   | 0.58 - 0.96 | 0.049  |
| Maximum WBC [G/L] before NEC onset                               | 0.97   | 0.89 - 1    | 0.49   |
| Minimum WBC [G/L] <7 days before NEC onset                       | 1      | 0.94 - 1.1  | 0.86   |
| Maximum WBC [G/L] <7 days before NEC onset                       | 1      | 0.99 - 1.1  | 0.13   |
| WBC at disease presentation [G/l]                                | 1      | 0.97 - 1.1  | 0.4    |
| Maximum WBC [G/l] during NEC                                     | 1      | 0.99 - 1.1  | 0.13   |
| Minimum PLT [G/l] before NEC onset                               | 0.99   | 0.97 - 1    | 0.019  |
| Minimum PLT [G/l] <7 days before NEC onset                       | 1      | 1 - 1       | 0.92   |
| Minimum PLT at disease presentation [G/l]                        | 1      | 0.99 - 1    | 0.037  |
| Minimum PLT [G/l] during NEC                                     | 0.99   | 0.99 - 1    | 0.018  |
| Maximum total bilirubin <7 days before NEC onset [mcmol/l]       | 0.99   | 0.99 - 1    | 0.13   |
| Maximal lactate [mmol/l] before NEC onset                        | 1.6    | 1.2 - 2.4   | 0.0072 |
| Maximal lactate [mmol/l] <7 days before NEC onset                | 1.6    | 1 - 2.5     | 0.045  |
| Lactate at disease presentation [mmol/L]                         | 1.3    | 1.1 - 1.6   | 0.0012 |
| Maximum Lactate [mmol/l] during NEC                              | 1.4    | 1.2 - 1.6   | <0.001 |
| Minimum pH before NEC onset                                      | 0.0072 | 0 - 13      | 0.2    |
| Minimum pH <7 days before NEC onset                              | 1e-04  | 0 - 0.18    | 0.021  |
| Maximum CRP before NEC onset                                     | 1      | 1 - 1.1     | 0.03   |
| Maximum CRP [mg/l] <7 days before NEC onset                      | 1      | 1 - 1.1     | 0.082  |
| CRP at disease presentation [mg/L]                               | 1      | 0.99 - 1    | 0.13   |
| Maximum CRP [mg/l] during NEC                                    | 1      | 0.99 - 1    | 0.53   |
| Maximum percentage of premature neutrophils at disease onset [%] | 1      | 1 - 1.1     | 0.06   |
| Maximum percentage of premature WBC at disease onset [%]         | 1      | 0.98 - 1    | 0.47   |
| Base excess at disease presentation [mmol/L]                     | 0.78   | 0.68 - 0.87 | <0.001 |
| Maximum base excess during NEC [mmol/L]                          | 0.74   | 0.64 - 0.83 | <0.001 |
| Maximum PTT after disease onset                                  | 1.1    | 1 - 1.2     | 0.13   |
| Maximum INR during NEC                                           | 7.3    | 1.4 - 76    | 0.056  |

Table V: Univariate regression - risk of severe NEC

| Value                                | OR    | CI95%         | P      |
|--------------------------------------|-------|---------------|--------|
| Birth weight [g]                     | 1     | 1 - 1         | 0.0026 |
| Birth weight percentile              | 1     | 0.99 - 1      | 0.83   |
| Birth length [cm]                    | 0.91  | 0.84 - 0.97   | 0.0057 |
| Birth length percentile              | 1     | 0.99 - 1      | 0.76   |
| Birth head circumference [cm]        | 0.85  | 0.76 - 0.94   | 0.0032 |
| Birth head circumference percentile  | 0.99  | 0.97 - 1      | 0.14   |
| Gestational age [weeks.days]         | 0.98  | 0.96 - 0.99   | 0.0014 |
| Number of infants in this birth      | 0.6   | 0.3 - 1.1     | 0.12   |
| Assisted delivery                    | 1.1   | 0.43 - 3.3    | 0.81   |
| Apgar 1 minute                       | 0.81  | 0.69 - 0.95   | 0.011  |
| Apgar 5 minutes                      | 0.81  | 0.66 - 0.98   | 0.031  |
| Apgar 10 minutes                     | 0.76  | 0.6 - 0.94    | 0.014  |
| Congenital heart disease             | 2.6   | 1.2 - 5.8     | 0.015  |
| PDA                                  | 3.3   | 1.6 - 6.9     | 0.0012 |
| Congenital malformations or syndroms | 0.9   | 0.36 - 2.1    | 0.81   |
| Age at diagnosis                     | 1     | 0.97 - 1      | 0.93   |
| Conservative treatment only          | 0.017 | 0.004 - 0.047 | <0.001 |
| NEC surgery                          | 61    | 21 - 223      | <0.001 |
| More than one surgery due to NEC     | 15    | 6.4 - 36      | <0.001 |
| Male gender                          | 1.3   | 0.66 - 2.7    | 0.44   |
| Year of birth                        | 1.1   | 0.96 - 1.2    | 0.21   |
| Re-NEC                               | 0.35  | 0.018 - 2     | 0.33   |
| Umbilical artery pH                  | 0.95  | 0.012 - 101   | 0.98   |
| Umbilical venous pH                  | 0.07  | 0 - 25        | 0.38   |

Table VI: Multivariate regression - risk of severe NEC

| Value                                                      | OR       | CI95 | P |
|------------------------------------------------------------|----------|------|---|
| Survival: last known status                                | infinity | N/A  | 1 |
| Birth weight [g]                                           | 0.883    | N/A  | 1 |
| Birth weight percentile                                    | 0.7087   | N/A  | 1 |
| Birth length [cm]                                          | infinity | N/A  | 1 |
| Birth length percentile                                    | 0.6127   | N/A  | 1 |
| Birth head circumference [cm]                              | 0        | N/A  | 1 |
| Birth head circumference percentile                        | 4.1948   | N/A  | 1 |
| Gestational age [weeks.days]                               | 2.9501   | N/A  | 1 |
| Number of infants in this birth                            | 0.0013   | N/A  | 1 |
| Assisted delivery                                          | infinity | N/A  | 1 |
| Apgar 1 minute                                             | infinity | N/A  | 1 |
| Apgar 5 minutes                                            | 0        | N/A  | 1 |
| Apgar 10 minutes                                           | 1e-04    | N/A  | 1 |
| Congenital heart disease                                   | infinity | N/A  | 1 |
| PDA                                                        | 0        | N/A  | 1 |
| Congenital malformations or syndroms                       | 0        | N/A  | 1 |
| Age at diagnosis                                           | 0.1738   | N/A  | 1 |
| Conservative treatment only                                | 0        | N/A  | 1 |
| More than one surgery due to NEC                           | 0        | N/A  | 1 |
| Male gender                                                | infinity | N/A  | 1 |
| Year of birth                                              | 0.0297   | N/A  | 1 |
| Re-NEC                                                     | 0        | N/A  | 1 |
| Umbilical artery pH                                        | infinity | N/A  | 1 |
| Minimum Hb [g/l] <7 days before NEC onset                  | 0.2923   | N/A  | 1 |
| Hb at disease presentation [g/l]                           | 1.6543   | N/A  | 1 |
| Minimum Hb during NEC [g/l]                                | 0.5405   | N/A  | 1 |
| Minimum WBC [G/L] <7 days before NEC onset                 | 44.2766  | N/A  | 1 |
| Maximum WBC [G/L] <7 days before NEC onset                 | 0.0088   | N/A  | 1 |
| WBC at disease presentation [G/l]                          | 0.3705   | N/A  | 1 |
| Maximum WBC [G/l] during NEC                               | 1.3859   | N/A  | 1 |
| Minimum PLT [G/l] <7 days before NEC onset                 | 1.1211   | N/A  | 1 |
| Minimum PLT at disease presentation [G/l]                  | 0.8327   | N/A  | 1 |
| Minimum PLT [G/l] during NEC                               | 1.0583   | N/A  | 1 |
| Maximum total bilirubin <7 days before NEC onset [mcmol/l] | 1.1107   | N/A  | 1 |
| Lactate at disease presentation [mmol/L]                   | 0.4488   | N/A  | 1 |
| Maximum Lactate [mmol/l] during NEC                        | 0.2884   | N/A  | 1 |
| CRP at disease presentation [mg/L]                         | 1.1236   | N/A  | 1 |
| Maximum CRP [mg/l] during NEC                              | 0.6618   | N/A  | 1 |
| Base excess at disease presentation [mmol/L]               | 0.5579   | N/A  | 1 |
| Maximum base excess during NEC [mmol/L]                    | 1.0105   | N/A  | 1 |

Table VII: Univariate regression - risk of severe NEC

| Value                                                            | OR     | CI95%       | P      |
|------------------------------------------------------------------|--------|-------------|--------|
| Minimum Hb [g/l] before NEC onset                                | 0.99   | 0.97 - 1    | 0.09   |
| Maximum Hb [g/l] before NEC onset                                | 1      | 0.98 - 1    | 0.68   |
| Minimum Hb [g/l] <7 days before NEC onset                        | 0.99   | 0.98 - 1    | 0.22   |
| Minimum Hb [g/l] 1-2 weeks before NEC onset                      | 0.99   | 0.98 - 1    | 0.55   |
| Hb at disease presentation [g/l]                                 | 0.99   | 0.97 - 1    | 0.019  |
| Minimum Hb during NEC [g/l]                                      | 0.97   | 0.95 - 0.98 | <0.001 |
| Minimum WBC [G/L] before NEC onset                               | 0.98   | 0.88 - 1.1  | 0.75   |
| Maximum WBC [G/L] before NEC onset                               | 1      | 0.95 - 1.1  | 0.92   |
| Minimum WBC [G/L] <7 days before NEC onset                       | 1      | 0.97 - 1.1  | 0.35   |
| Maximum WBC [G/L] <7 days before NEC onset                       | 1      | 0.98 - 1.1  | 0.22   |
| WBC at disease presentation [G/l]                                | 1      | 0.99 - 1.1  | 0.15   |
| Maximum WBC [G/l] during NEC                                     | 1.1    | 1 - 1.1     | 0.0018 |
| Minimum PLT [G/l] before NEC onset                               | 1      | 0.99 - 1    | 0.25   |
| Minimum PLT [G/l] <7 days before NEC onset                       | 1      | 0.99 - 1    | 0.21   |
| Minimum PLT at disease presentation [G/l]                        | 0.99   | 0.99 - 1    | 0.0014 |
| Minimum PLT [G/l] during NEC                                     | 0.99   | 0.98 - 0.99 | <0.001 |
| Maximum total bilirubin <7 days before NEC onset [mcmol/l]       | 1      | 1 - 1       | 0.41   |
| Maximal lactate [mmol/l] before NEC onset                        | 1.3    | 0.95 - 1.7  | 0.1    |
| Maximal lactate [mmol/l] <7 days before NEC onset                | 1.4    | 1 - 2.2     | 0.062  |
| Lactate at disease presentation [mmol/L]                         | 1.5    | 1.3 - 1.9   | <0.001 |
| Maximum Lactate [mmol/l] during NEC                              | 1.7    | 1.4 - 2.1   | <0.001 |
| Minimum pH before NEC onset                                      | 0.64   | 0.001 - 354 | 0.89   |
| Minimum pH <7 days before NEC onset                              | 0.0056 | 0 - 2       | 0.088  |
| Maximum CRP before NEC onset                                     | 1      | 0.97 - 1    | 0.74   |
| Maximum CRP [mg/l] <7 days before NEC onset                      | 0.99   | 0.96 - 1    | 0.71   |
| CRP at disease presentation [mg/L]                               | 1      | 0.99 - 1    | 0.16   |
| Maximum CRP [mg/l] during NEC                                    | 1      | 1 - 1       | <0.001 |
| Maximum percentage of premature neutrophils at disease onset [%] | 1      | 1 - 1.1     | 0.0014 |
| Maximum percentage of premature WBC at disease onset [%]         | 1      | 1 - 1.1     | 0.034  |
| Base excess at disease presentation [mmol/L]                     | 0.75   | 0.66 - 0.84 | <0.001 |
| Maximum base excess during NEC [mmol/L]                          | 0.71   | 0.62 - 0.8  | <0.001 |
| Maximum PTT after disease onset                                  | 1      | 0.97 - 1    | 0.95   |
| Maximum INR during NEC                                           | 23     | 2.9 - 312   | 0.0081 |

Table VIII: Predictors of severe NEC

| Value                                                            | ROC-analysis |        |             |             |      |      | Univariate regression |               |        |
|------------------------------------------------------------------|--------------|--------|-------------|-------------|------|------|-----------------------|---------------|--------|
|                                                                  | AUC          | cutoff | sensitivity | specificity | PPV  | NPV  | OR                    | CI95%         | P      |
| Birth length [cm]                                                | 0.64         | 39     | 0.6         | 0.7         | 0.44 | 0.82 | 3.5                   | 1.7 - 7.5     | <0.001 |
| Birth head circumference [cm]                                    | 0.67         | 28     | 0.69        | 0.62        | 0.45 | 0.82 | 3.7                   | 1.7 - 8.6     | 0.0013 |
| Gestational age [weeks.days]                                     | 0.67         | 31.2   | 0.75        | 0.6         | 0.42 | 0.86 | 4.5                   | 2.1 - 10      | <0.001 |
| Apgar 1 minute                                                   | 0.64         | 5.5    | 0.64        | 0.57        | 0.36 | 0.81 | 2.4                   | 1.2 - 5.1     | 0.019  |
| Apgar 5 minutes                                                  | 0.65         | 7.5    | 0.67        | 0.64        | 0.41 | 0.84 | 3.2                   | 1.5 - 7       | 0.0033 |
| Congenital heart disease                                         | NA           | NA     | NA          | NA          | NA   | NA   | 2.6                   | 1.2 - 5.8     | 0.015  |
| PDA                                                              | NA           | NA     | NA          | NA          | NA   | NA   | 3.3                   | 1.6 - 6.9     | 0.0012 |
| Conservative treatment only                                      | NA           | NA     | NA          | NA          | NA   | NA   | 0.017                 | 0.004 - 0.047 | <0.001 |
| NEC surgery                                                      | NA           | NA     | NA          | NA          | NA   | NA   | 61                    | 21 - 223      | <0.001 |
| More than one surgery due to NEC                                 | NA           | NA     | NA          | NA          | NA   | NA   | 15                    | 6.4 - 36      | <0.001 |
| Minimum Hb during NEC [g/l]                                      | 0.71         | 110    | 0.68        | 0.66        | 0.43 | 0.85 | 2.8                   | 1 - 7.5       | 0.042  |
| Maximum WBC [G/l] during NEC                                     | 0.68         | 22     | 0.65        | 0.71        | 0.45 | 0.85 | 4                     | 1.8 - 9.3     | <0.001 |
| Lactate at disease presentation [mmol/L]                         | 0.75         | 2.6    | 0.67        | 0.74        | 0.47 | 0.86 | 3.7                   | 1.7 - 8.3     | 0.0012 |
| Maximum Lactate [mmol/l] during NEC                              | 0.82         | 3.8    | 0.72        | 0.8         | 0.55 | 0.89 | 4.2                   | 1.9 - 9.7     | <0.001 |
| Maximum percentage of premature neutrophils at disease onset [%] | 0.72         | 34     | 0.65        | 0.73        | 0.44 | 0.87 | 2.9                   | 1.2 - 7.4     | 0.025  |
| Maximum INR during NEC                                           | 0.79         | 1.4    | 0.74        | 0.79        | 0.78 | 0.75 | 10                    | 2.5 - 53      | 0.0022 |

Table IX: Multivariate regression - risk of death

|                                                            | Value | OR       | CI95 | P |
|------------------------------------------------------------|-------|----------|------|---|
| Bell III                                                   |       | 0        | N/A  | 1 |
| Birth weight [g]                                           |       | 0.9865   | N/A  | 1 |
| Birth weight percentile                                    |       | 0.3606   | N/A  | 1 |
| Birth length [cm]                                          |       | infinity | N/A  | 1 |
| Birth length percentile                                    |       | 0.5646   | N/A  | 1 |
| Birth head circumference [cm]                              |       | 0        | N/A  | 1 |
| Birth head circumference percentile                        |       | 3.5629   | N/A  | 1 |
| Gestational age [weeks.days]                               |       | 0.4212   | N/A  | 1 |
| Number of infants in this birth                            |       | 2.2644   | N/A  | 1 |
| Assisted delivery                                          |       | 1.4503   | N/A  | 1 |
| Apgar 1 minute                                             |       | 0.9566   | N/A  | 1 |
| Apgar 5 minutes                                            |       | infinity | N/A  | 1 |
| Apgar 10 minutes                                           |       | 0        | N/A  | 1 |
| Congenital heart disease                                   |       | infinity | N/A  | 1 |
| PDA                                                        |       | infinity | N/A  | 1 |
| Congenital malformations or syndroms                       |       | 0        | N/A  | 1 |
| Age at diagnosis                                           |       | 2.4191   | N/A  | 1 |
| Conservative treatment only                                |       | 0        | N/A  | 1 |
| More than one surgery due to NEC                           |       | 0        | N/A  | 1 |
| Male gender                                                |       | 0.7794   | N/A  | 1 |
| Year of birth                                              |       | 0.8336   | N/A  | 1 |
| Re-NEC                                                     |       | infinity | N/A  | 1 |
| Umbilical artery pH                                        |       | infinity | N/A  | 1 |
| Minimum Hb [g/l] <7 days before NEC onset                  |       | 0.7397   | N/A  | 1 |
| Hb at disease presentation [g/l]                           |       | 1.514    | N/A  | 1 |
| Minimum Hb during NEC [g/l]                                |       | 0.6897   | N/A  | 1 |
| Minimum WBC [G/L] <7 days before NEC onset                 |       | 1.3417   | N/A  | 1 |
| Maximum WBC [G/L] <7 days before NEC onset                 |       | 0.5367   | N/A  | 1 |
| WBC at disease presentation [G/l]                          |       | 1.3708   | N/A  | 1 |
| Maximum WBC [G/l] during NEC                               |       | 1.0823   | N/A  | 1 |
| Minimum PLT [G/l] <7 days before NEC onset                 |       | 0.981    | N/A  | 1 |
| Minimum PLT at disease presentation [G/l]                  |       | 0.9967   | N/A  | 1 |
| Minimum PLT [G/l] during NEC                               |       | 0.9726   | N/A  | 1 |
| Maximum total bilirubin <7 days before NEC onset [mcmol/l] |       | 1.046    | N/A  | 1 |
| Lactate at disease presentation [mmol/L]                   |       | 2.2683   | N/A  | 1 |
| Maximum Lactate [mmol/l] during NEC                        |       | 0.012    | N/A  | 1 |
| CRP at disease presentation [mg/L]                         |       | 1.2617   | N/A  | 1 |
| Maximum CRP [mg/l] during NEC                              |       | 0.8143   | N/A  | 1 |
| Base excess at disease presentation [mmol/L]               |       | 2.0216   | N/A  | 1 |
| Maximum base excess during NEC [mmol/L]                    |       | 0.0096   | N/A  | 1 |

Table X: Types of CHD in the patient cohort

| Type                                              | Total | Survivors | Non-Survivors | Bell III | Bell II |
|---------------------------------------------------|-------|-----------|---------------|----------|---------|
| diseases with relevant reverse abdominal flow (A) | 4     | 1         | 3             | 2        | 2       |
| diseases with lower systolic output (B)           | 5     | 3         | 2             | 2        | 3       |
| cyanotic heart diseases (C)                       | 2     | 1         | 1             | 0        | 2       |
| diseases with shunts (D)                          | 21    | 18        | 3             | 10       | 11      |
| pulmonary hypertension (E)                        | 3     | 2         | 1             | 1        | 2       |
